# Supplementary material for: NiMo sputter-deposition on tape-casted NiFe foam for anion exchange membrane water electrolysis
Source: Royal Society of Chemistry journal article supplement (doi:10.1039/d5lf00358j), 2025-12-12
Supplement: d5lf00358j1.pdf [file d5lf00358j1.pdf]

## Supporting information

### NiMo sputter-deposition on tape-casted NiFe foam for anion exchange membrane water electrolysis

Shuo-En Yu<sup>1</sup>, I-Chung Cheng<sup>2,\*</sup>, I-Chun Cheng<sup>3</sup>, Jian-Zhang Chen<sup>1,4,5,\*</sup>

<sup>1</sup> Graduate School of Advanced Technology, National Taiwan University, Taipei City 106319, Taiwan

<sup>2</sup> Department of Mechanical Engineering, National Taiwan University, Taipei City 106319, Taiwan

<sup>3</sup> Graduate Institute of Photonics and Optoelectronics and Department of Electrical Engineering, National Taiwan University, Taipei City 106319, Taiwan

<sup>4</sup> Institute of Applied Mechanics, National Taiwan University, Taipei City 106319, Taiwan

<sup>5</sup> Advanced Research Center for Green Materials Science and Technology, National Taiwan University, Taipei City 106319, Taiwan

\*Corresponding Authors:

jchen@ntu.edu.tw (Jian-Zhang Chen)

ichungch@ntu.edu.tw (I-Chung Cheng)

#### List

**Figure S1.** Photographs of individual components of the AEM cell

**Figure S2.** EDS mapping results: (a) NiFe foam and (b) NiMo@NiFe foam

**Figure S3.** EDS elemental analysis: (a) NiFe foam and (b) NiMo@NiFe foam

**Table S1.** Proportional distribution of Ni 2p oxidation states

**Table S2.** Proportional distribution of Fe 2p oxidation states

**Table S3.** Proportional distribution of Mo 3d oxidation states

**Figure S4.** Water contact angle measurements: (a) NiFe foam and (b) NiMo@NiFe foam

**Figure S5.** LSV polarization curves for HER without iR-compensation

**Table S5.** OER overpotentials without iR-compensation

**Figure S6.** LSV polarization curves for OER without iR-compensation

**Table S5.** OER overpotentials without iR-compensation

**Figure S7.** CV curves of (a) NiFe foam and (b) NiMo@NiFe foam, and (c) 2C<sub>dl</sub> analysis.

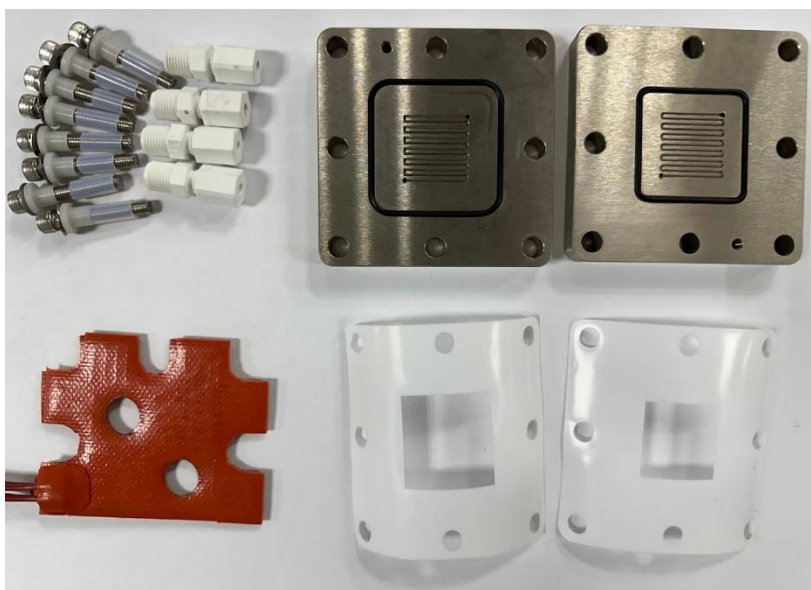

**Figure S1.** Photographs of individual components of the AEM cell

**(a)**

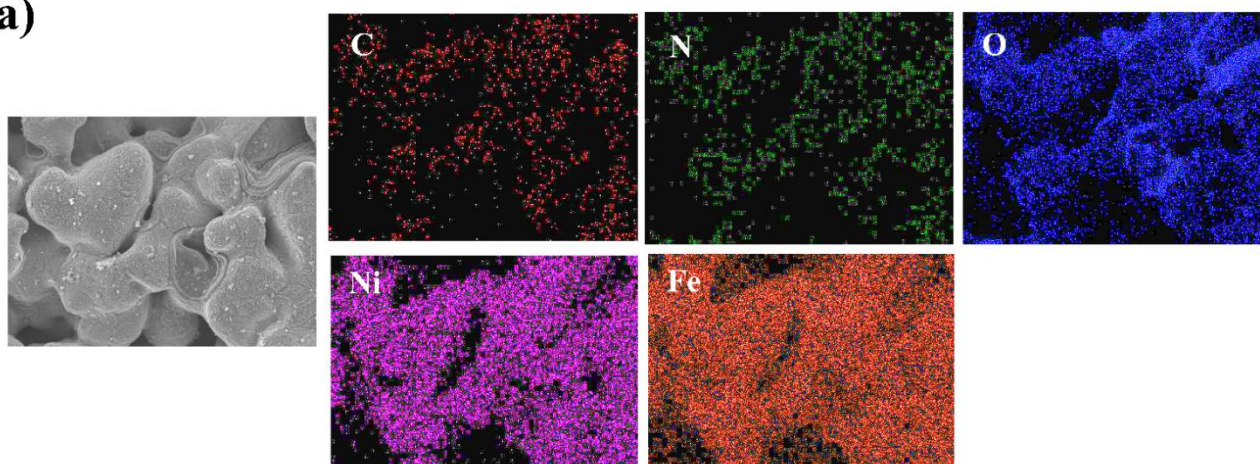

**(b)**

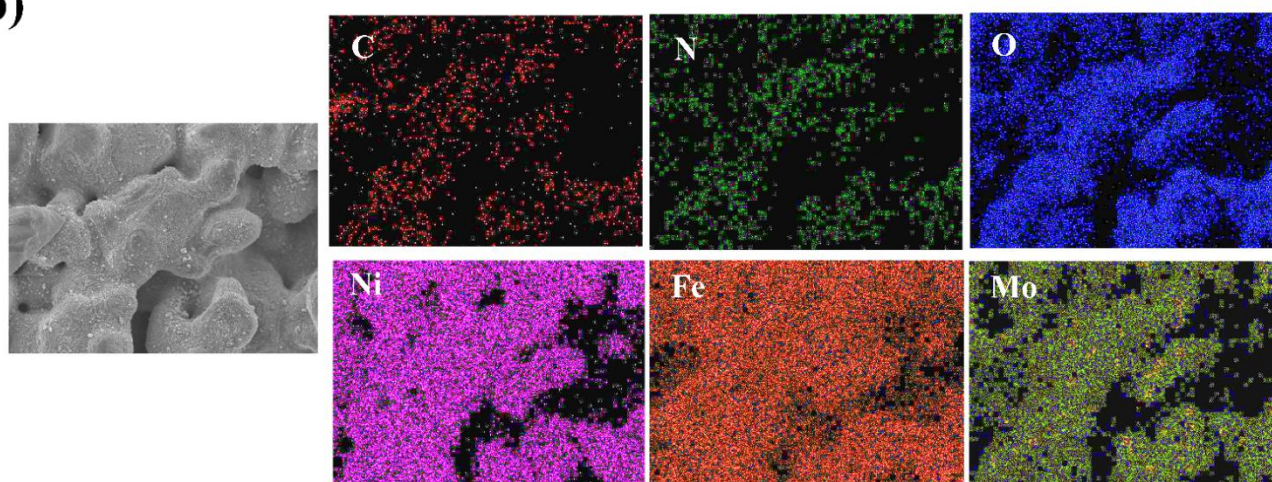

**Figure S2.** EDS mapping results: (a) NiFe foam and (b) NiMo@NiFe foam

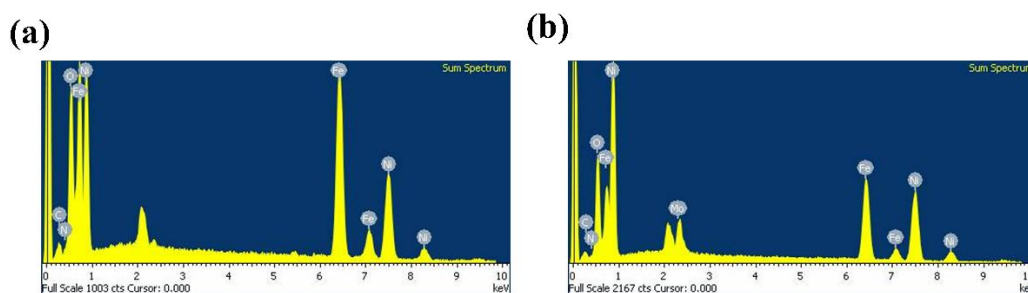

**Figure S3.** EDS elemental analysis: (a) NiFe foam and (b) NiMo@NiFe foam

**Table S1.** Proportional distribution of Ni 2p oxidation states

| Element        | Ni <sup>0</sup> | Ni <sup>2+</sup> | Ni <sup>3+</sup> | Ni <sup>3+</sup> /Ni <sup>2+</sup> |
|----------------|-----------------|------------------|------------------|------------------------------------|
| NiFe foam      | 0.68%           | 73.31%           | 25.99%           | 0.35                               |
| NiMo@NiFe foam | 4.02%           | 75.23%           | 20.74%           | 0.27                               |

**Table S2.** Proportional distribution of Fe 2p oxidation states

| Element        | Fe <sup>2+</sup> | Fe <sup>3+</sup> | Fe <sup>3+</sup> /Fe <sup>2+</sup> |
|----------------|------------------|------------------|------------------------------------|
| NiFe foam      | 70.60%           | 29.39%           | 0.42                               |
| NiMo@NiFe foam | N/A              | N/A              | N/A                                |

**Table S3.** Proportional distribution of Mo 3d oxidation states

| Element        | Mo <sup>0</sup> | Mo <sup>4+</sup> | Mo <sup>5+</sup> | Mo <sup>6+</sup> |
|----------------|-----------------|------------------|------------------|------------------|
| NiFe foam      | N/A             | N/A              | N/A              | N/A              |
| NiMo@NiFe foam | 1.81%           | 26.66%           | 51.18%           | 20.36%           |

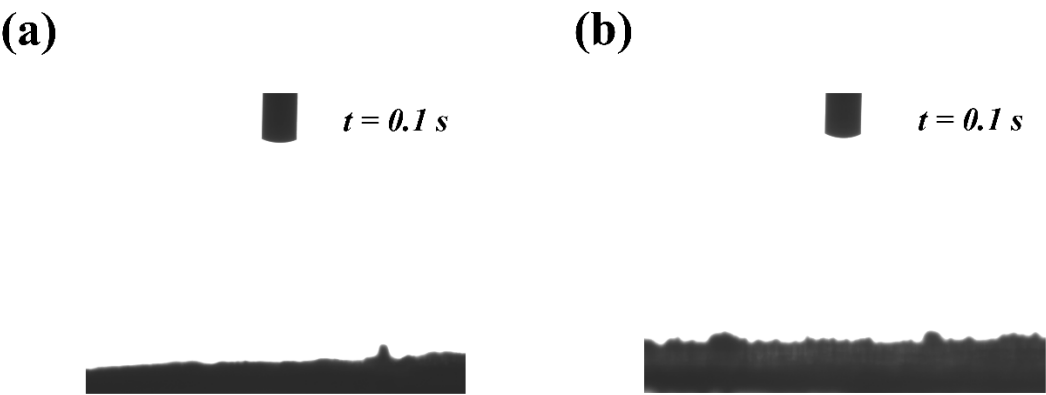

**Figure S4.** Water contact angle measurements: (a) NiFe foam and (b) NiMo@NiFe foam

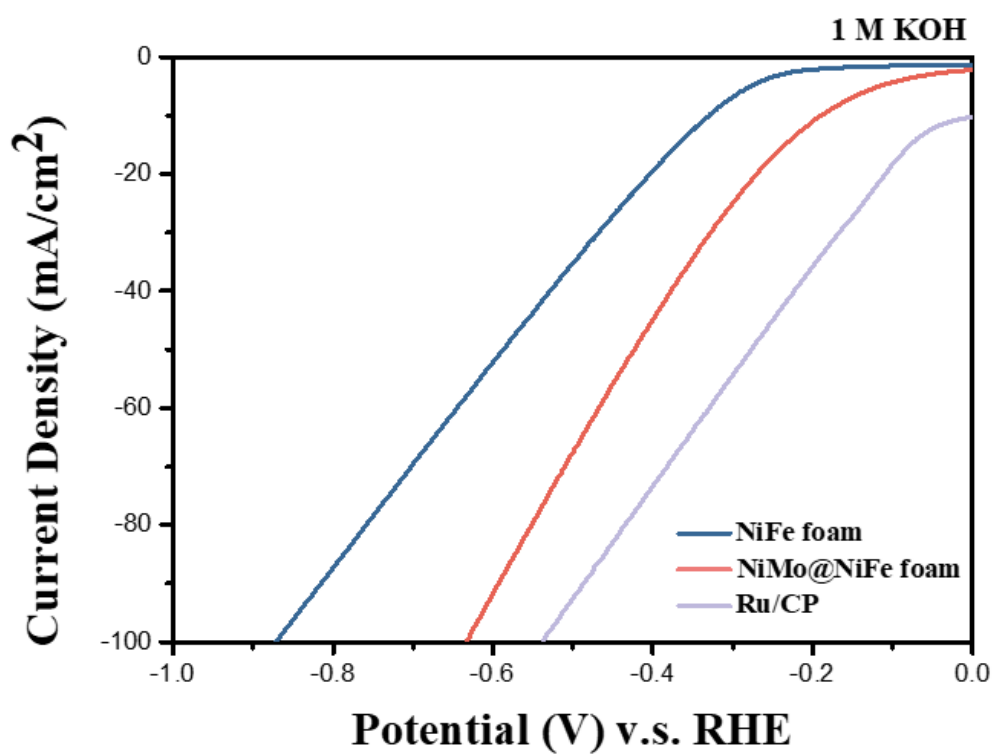

**Figure S5.** LSV polarization curves for HER without iR-compensation

**Table S4.** HER overpotentials without iR-compensation

| Overpotential<br>(mV) | @ 10 mA/cm <sup>2</sup> | @ 50 mA/cm <sup>2</sup> | @ 100 mA/cm <sup>2</sup> |
|-----------------------|-------------------------|-------------------------|--------------------------|
| NiFe foam             | 330.1                   | 588.9                   | 872.7                    |
| NiMo@NiFe foam        | 189.1                   | 442.9                   | 663.2                    |
| Ru/CP                 | 29.8                    | 276.4                   | 540.7                    |

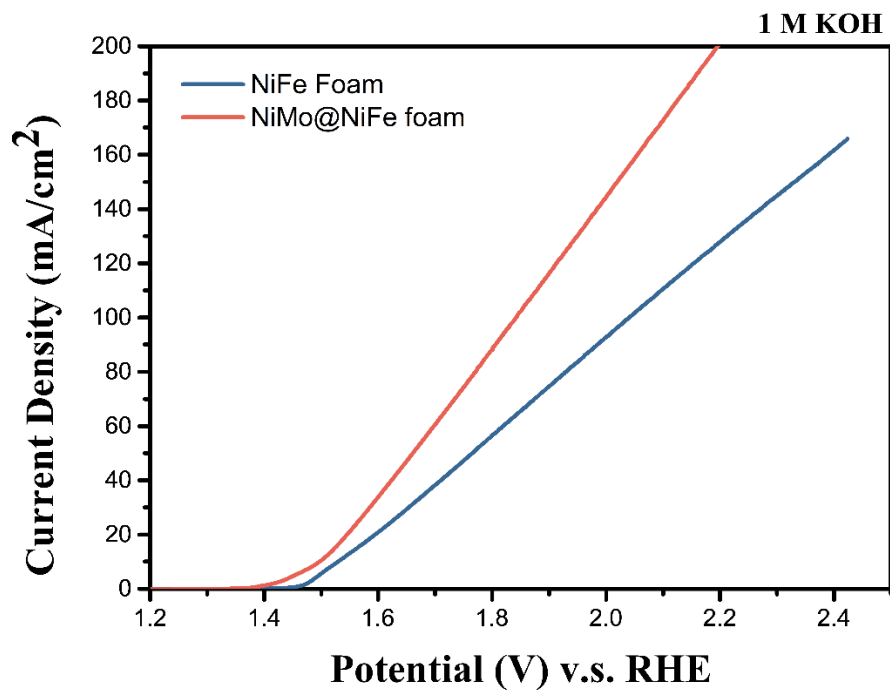

**Figure S6.** LSV polarization curves for OER without iR-compensation

**Table S5.** OER overpotentials without iR-compensation

| Overpotential<br>(mV) | @ 10 mA/cm <sup>2</sup> | @ 50 mA/cm <sup>2</sup> | @ 100 mA/cm <sup>2</sup> |
|-----------------------|-------------------------|-------------------------|--------------------------|
| NiFe foam             | 298.7                   | 535.7                   | 810.7                    |
| NiMo@NiFe foam        | 267.3                   | 430.8                   | 610.8                    |

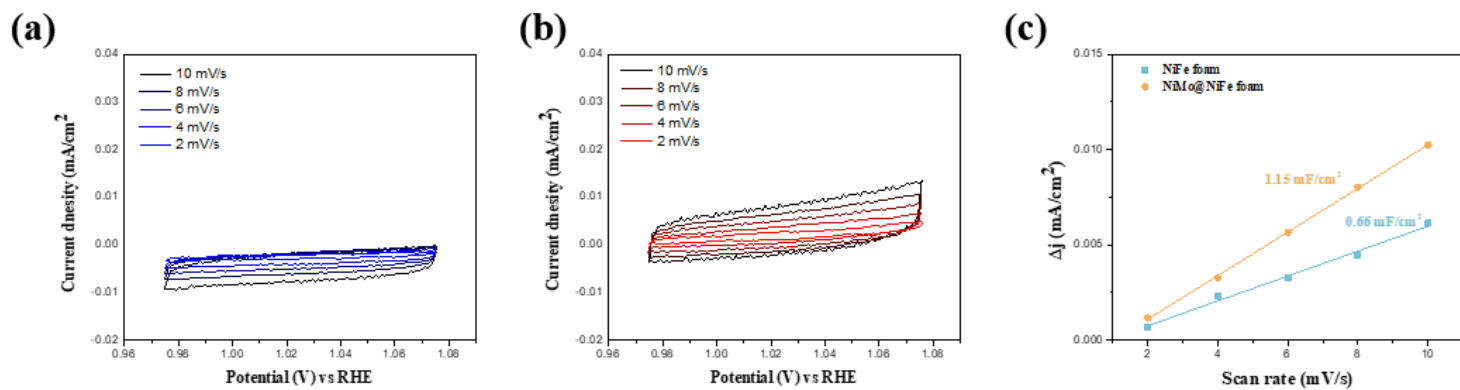

**Figure S7.** CV curves of (a) NiFe foam and (b) NiMo@NiFe foam, and (c)  $2C_{dl}$  analysis.
